# Supplementary material for: Testicular hormones mediate robust sex differences in impulsive choice in rats
Source: eLife. 2020 Sep 28;9:e58604. doi: 10.7554/eLife.58604 (PMC7521924; doi:10.7554/eLife.58604)
Supplement: Figure 2—source data 1. [file elife-58604-fig2-data1.xlsx]

## Sheet: Sheet1
	Males																Females
	1	3	5	7	9	11	13	15	17	19	21	23	25	27	29	31	2	4	6	8	10	12	14	16	18	20	22	24	26	28	30	32
0	100	100	90	96	100	100	100	100	100	100	100	98	96	98	98	100	100	98	100	90	100	98	96	98	100	84	98	98	98	96	82	94
10	97.5	78	49.3333	22	40.8889	93.7778	68.5	70	90	21.11	100	78	90	84	52.67	93.78	16	11.5	8	2.22	87.78	92.92	16.44	4	84.67	37.97	41.33	6.67	6.22	2	8.72	4
20	85.1429	56	28.6667	6	22.8889	89.2063	48	38.8889	75.78	0	100	54	86	65.39	10	86	0	5	2	0	86.94	91.94	0	0	77.14	12	12	0	0	0	0	0
40	86.3492	33.5556	20	2	16	79.8333	46	26	46	2.22	100	32	87.56	58.9	6	75.72	2.5	7.94	2.22	0	61.07	89.43	2.5	2.22	51.67	12.44	2	0	0	0	0	0
60	92.6667	28.381	14	2	18	51.3889	34	14	38	0	98	26	88	35.94	0	70.76	0	2	0	0	58	75	0	0	50.48	6.44	2.22	0	0	0	0	0
