# Supplementary material for: Testicular hormones mediate robust sex differences in impulsive choice in rats
Source: eLife. 2020 Sep 28;9:e58604. doi: 10.7554/eLife.58604 (PMC7521924; doi:10.7554/eLife.58604)
Supplement: Figure 2—source data 2. [file elife-58604-fig2-data2.xlsx]

## Sheet: Sheet1
	Proestrus																Estrus																Metestrus																Diestrus
	2	4	6	8	10	12	14	16	18	20	22	24	26	28	30	32	2	4	6	8	10	12	14	16	18	20	22	24	26	28	30	32	2	4	6	8	10	12	14	16	18	20	22	24	26	28	30	32	2
0	100	100	90	100	100	100	90	100	100	80	100	95	100	96.6667	85	95	100	100	93.3333	95	100	100	100	100	100	100	95	100	100	100	90	100	95	100	100	100	100	100	100	98	100	100	82.963	93.3333	96.6667	80	83.3333	92.5	100
10	0	25	10	0	95	100	44.4444	0	79.7222	30	20	0	5.27778	3.7037	0	10	5.55556	11.1111	3.33333	5	75.9259	95	11.1111	10	83.3333	30	25	0	0	0	4.16667	0	2.77778	3.7037	6.66667	0	87.5	100	13.3333	2	83.8889	43.3333	20.3704	6.66667	16.6667	4.16667	3.33333	5	5
20	0	0	0	0	59.7222	75.7143	0	0	73.8095	0	0	0	0	0	0	0	0	0	0	0	47.619	85	0	0	78.1481	0	0	0	0	0	0	0	0	0	0	0	73.5119	90	10.3704	0	75	10	3.33333	0	0	0	0	0	0
40	0	0	0	0	62.5	73.3333	0	0	50.9425	10	5	0	0	0	0	0	0	0	0	0	66.6667	75	0	0	47.6852	0	0	0	0	0	0	0	0	0	0	0	59.6726	83.3333	0	0	41.6667	0	0	0	0	0	0	0	6.25
60	0	0	0	0	41.6667	87.5	0	0	14.1667	10	0	0	0	0	0	0	0	0	0	0	42.7778	0	0	0	17.5	0	5.55556	0	0	0	0	0	0	0	0	0	62.9167	100	0	0	38.0952	6.66667	3.33333	0	0	0	0	0	0
[truncated: 15 more columns]
