# Supplementary material for: Testicular hormones mediate robust sex differences in impulsive choice in rats
Source: eLife. 2020 Sep 28;9:e58604. doi: 10.7554/eLife.58604 (PMC7521924; doi:10.7554/eLife.58604)
Supplement: Figure 3—source data 1. [file elife-58604-fig3-data1.xlsx]

## Sheet: Sheet1
	Small Reward																Large Reward																Small Reward																Large Reward
	1	3	5	7	9	11	13	15	17	19	21	23	25	27	29	31	1	3	5	7	9	11	13	15	17	19	21	23	25	27	29	31	301	302			305	306	307	308	309	310	311		313	314	315	316	301
0	1.649	1.435	1.566	1.347	2.815	2.5	2.38	1.528	2.224	1.31	2.029	1.456	1.856	1.545	1.508	2.086	0.79	0.797	0.972	0.719	1.448	1.185	0.80375	0.821	1.595	0.963	0.944	0.795	0.72	1.158	1.31333	0.655	2.529	2.195			1.134	2.124	1.741	1.71	2.064	1.598	1.572		1.347	1.915	1.518	1.803	1.33
10	2.325	2.656	1.25	1.279	2.576	4.4225	2.085	1.891	2.979	1.582	1.613	1.331	1.689	3.023	1.95	2.709	1.148	0.616	0.876	1.276	1.151	2.723	0.7675	0.941	1.824	0.804	0.951	0.948	0.72	0.873	1.478	0.783	2.4875	3.689			1.812	2.3	2.703	0.954	2.078	2.066	3.287		1.46	1.761	1.015	1.725	3.035
20	4.34	4.299	1.258	0.896	1.623	5.20875	1.5425	2.227	3.075	0.951	1.737	0.965	2.419	2.4	1.386	2.886	2.24167	1.032	1.64	5.2825	3.809	3.916	1.0734	1.419	2.598	5.405	1.213	1.174	1.049	1.85875	5.024	1.145	1.601	1.55667			2.072	3.733	1.936	1.292	2.14	1.293	2.007		1.254	1.437	1.053	1.39625	8.33667
40	4.1575	4.201	1.24	1.062	2.017	4.419	1.548	1.072	2.218	1.045	1.575	1.256	2.205	2.202	1.469	3.302	3.01333	1.179	1.552	4.108	5.2075	4.835	1.045	1.649	3.991	4.01	1.371	1.269	1.2484	2.45	4.108	1.13125	1.612	2.057			2.00167	4.81833	1.731	0.889	4.617	1.6275	2.895		1.36375	1.295	1.027	1.47	8.04667
60	3.825	2.313	1.547	1.4325	1.438	4.855	2.014	1.383	3.224	1.127	1.871	1.0374	2.256	1.958	1.62	2.8875	3.354	1.217	1.697	5.5775	5.572	5.14125	0.963	1.599	3.67333	4.05625	1.579	0.93375	1.102	3.76125	6.63625	1.227	1.456	2.15			1.40333	3.72	2.139	0.944	2.53667	1.772	1.88125		1.58625	1.298	0.942	1.219	7.08
[truncated: 12 more columns]
