# Supplementary material for: Testicular hormones mediate robust sex differences in impulsive choice in rats
Source: eLife. 2020 Sep 28;9:e58604. doi: 10.7554/eLife.58604 (PMC7521924; doi:10.7554/eLife.58604)
Supplement: Figure 3—source data 2. [file elife-58604-fig3-data2.xlsx]

## Sheet: Sheet1
	Small Reward																Large Reward																Small Reward																Large Reward
	1	3	5	7	9	11	13	15	17	19	21	23	25	27	29	31	1	3	5	7	9	11	13	15	17	19	21	23	25	27	29	31	301	302	303	304	305	306	307	308	309	310	311	312	313	314	315	316	301
0	0	0	0	0	0	0	0	0	0	0	0	0	0	0	0	0	0	0	0	0	0	0	20	0	0	0	0	0	0	0	40	20	0	0	0	0	0	0	0	0	0	0	0	0	0	0	0	0	0
10	0	0	0	0	0	20	0	0	0	0	0	0	0	0	0	0	0	0	0	0	0	0	20	0	0	0	0	0	0	0	0	0	20	0	0	20	0	0	0	0	0	0	0	0	0	0	0	0	0
20	20	0	0	0	0	20	20	0	0	0	0	0	0	0	0	0	40	0	0	20	0	0	0	0	0	40	0	0	0	20	0	0	0	40	0	0	0	0	0	0	20	0	0	20	0	0	0	20	40
40	60	0	0	0	0	0	0	0	0	0	0	0	20	0	0	0	40	0	0	0	20	0	0	0	0	60	0	0	0	0	0	20	0	0	0	0	40	40	0	0	0	20	0	0	20	0	0	20	40
60	80	0	0	20	0	0	0	0	0	0	0	0	0	0	0	20	0	0	0	20	0	20	0	0	40	20	0	20	0	20	20	0	0	0	0	0	40	80	0	0	40	0	20	0	20	0	0	0	40
[truncated: 15 more columns]
