# Supplementary material for: Testicular hormones mediate robust sex differences in impulsive choice in rats
Source: eLife. 2020 Sep 28;9:e58604. doi: 10.7554/eLife.58604 (PMC7521924; doi:10.7554/eLife.58604)
Supplement: Figure 4—source data 1. [file elife-58604-fig4-data1.xlsx]

## Sheet: Sheet1
Delay (s)	Males: Baseline																Males: Pre-Fed																Females: Baseline																Females: Pre-Fed
	1	3	5	7	9		13	15		19	21	23	25	27	29	31	1	3	5	7	9		13	15		19	21	23	25	27	29	31	301	302	303	304			307	308			311	312	313	314	315		301
0	100	100	100	100	100		100	100		100	100	100	90	100	100	90	100	100	100	100	100		100	100		80	100	80	100	100	100	90	100	100	90	90			90	100			80	100	100	100	90		100
10	100	80	60	40	80		60	80		33.33	100	100	90	100	50	70	100	80	50	30	100		20	40		0	90	40	100	90	37.5	100	0	25	20	0			55.56	0			10	10	10	0	10		0
20	100	60	20	10	44.4444		80	60		0	80	40	100	100	22.22	70	100	30	10	10	50		30	33.3333		0	80	40	100	87.5	0	70	0	0	0	0			0	0			0	0	0	0	0		0
40	100	50	0	0	40		50	40		0	100	30	100	80	0	70	100	11.1111	22.2222	0	10		40	33.3333		0	80	10	100	66.67	0	90	0	0	0	0			0	0			0	0	0	0	0		0
60	100	33.3333	0	10	30		30	0		0	100	40	100	33.33	0	40	80	20	25	0	22.2222		50	25		0	75	40	100	37.5	0	80	0	0	0	0			0	0			0	0	0	0	0		0
[truncated: 10 more columns]
