# Supplementary material for: Testicular hormones mediate robust sex differences in impulsive choice in rats
Source: eLife. 2020 Sep 28;9:e58604. doi: 10.7554/eLife.58604 (PMC7521924; doi:10.7554/eLife.58604)
Supplement: Figure 4—source data 2. [file elife-58604-fig4-data2.xlsx]

## Sheet: Sheet1
	Restricted	Ad libitum
1	100	96
3	64.7	48.2
5	36	41.4
7	32	28
9	58.9	56.4
11
13	64	48
15	56	46.3
17
19	26.7	16
21	96	85
23	62	42
25	96	100
27	82.7	76.3
29	34.4	27.5
31	68	86
301	20	20
302	25	20
303	22	22
304	18	20
307	29.11	12
308	20	0
311	18	25.71
312	22	20
313	22	20
314	20	22
315	20	18
