# Supplementary material for: Testicular hormones mediate robust sex differences in impulsive choice in rats
Source: eLife. 2020 Sep 28;9:e58604. doi: 10.7554/eLife.58604 (PMC7521924; doi:10.7554/eLife.58604)
Supplement: Figure 4—source data 3. [file elife-58604-fig4-data3.xlsx]

## Sheet: Sheet1
	Males																Females
	ARW01	ARW03	ARW05	ARW07	ARW09	ARW11	ARW13	ARW15	ARW17	ARW19	ARW21	ARW23	ARW25	ARW27	ARW29	ARW31	301	302	303	304	305	306	307	308	309	310	311	312	313	314	315	316
Restricted	16	2	0	0	2	6	0	0	2	6	4	0	0	8	4	0	2	20	0	4	18	44	2	0	34	2	2	0	0	6	6	14
Ad libitum	20	2	6	0	2	44	0	16	46	6	4	0	6	10	16	0	4	16	8	14	62	10	14	4	56	50	12	4	2	10	4	68
