# Supplementary material for: Testicular hormones mediate robust sex differences in impulsive choice in rats
Source: eLife. 2020 Sep 28;9:e58604. doi: 10.7554/eLife.58604 (PMC7521924; doi:10.7554/eLife.58604)
Supplement: Figure 4—source data 4. [file elife-58604-fig4-data4.xlsx]

## Sheet: Sheet1
Delay (s)	Males: Baseline																Males: Pre-Fed																Females: Baseline																Females: Pre-Fed
	1	3	5	7	9	11	13	15	17	19	21	23	25	27	29	31	1	3	5	7	9	11	13	15	17	19	21	23	25	27	29	31	301	302	303	304	305	306	307	308		310		312	313	314	315		301
0	100	100	100	100	100	100	100	100	90	60	100	90	100	100	100	100	100	100	100	90	100	100	90	100	100	88.89	100	100	90	100	100	100	100	100	100	100	90	100	90	90		100		80	100	100	90		100
10	100	90	30	20	100	100	40	90	100	22.22	100	60	100	100	44.44	87.5	100	70	40	30	100	90	20	90	75	22.22	90	20	100	90	55.56	100	0	12.5	20	0	90	90	10	0		10		0	10	0	10		0
20	88.8889	55.5556	0	0	90	88.8889	30	77.7778	50	0	88.89	20	100	75	10	100	87.5	28.5714	10	10	70	100	10	44.4444	100	0	80	11.11	100	100	0	100	0	0	0	0	28.57	70	0	0		11.11		0	0	0	0		0
40	44.4444	50	10	10	77.7778	87.5	20	40	57.14	0	85.71	40	100	50	0	87.5	30	71.4286	10	0	33.3333	50	10	11.1111	100	0	71.43	50	100	50	0	90	0	0	0	0	66.67	87.5	0	0		10		0	0	0	0		0
60	100	11.1111	0	0	30	50	40	0	22.22	0	62.5	30	77.78	40	12.5	77.78	62.5	42.8571	10	0	20	0	10	10	66.67	0	66.67	20	66.67	44.44	0	66.67	0	0	0	0	100	50	0	0		0		0	0	0	0		0
[truncated: 12 more columns]
