# Supplementary material for: Testicular hormones mediate robust sex differences in impulsive choice in rats
Source: eLife. 2020 Sep 28;9:e58604. doi: 10.7554/eLife.58604 (PMC7521924; doi:10.7554/eLife.58604)
Supplement: Figure 4—source data 5. [file elife-58604-fig4-data5.xlsx]

## Sheet: Sheet1
	Restricted	Ad libitum
1	86.7	76
3	61.3	62.6
5	28	34
7	26	26
9	79.6	64.7
11	85.3	68
13	46	28
15	61.6	51.1
17	63.9	88.3
19	16.4	22.2
21	87.4	81.6
23	48	40.2
25	95.6	91.3
27	73	76.9
29	33.4	31.1
31	90.6	91.3
301	20	20
302	22.5	20
303	24	28
304	20	22
305	75.05	50
306	79.5	88
307	20	22.44
308	18	20
310	26.22	24
312	16	0
313	22	22.22
314	20	15.56
315	20	18
