# Supplementary material for: Testicular hormones mediate robust sex differences in impulsive choice in rats
Source: eLife. 2020 Sep 28;9:e58604. doi: 10.7554/eLife.58604 (PMC7521924; doi:10.7554/eLife.58604)
Supplement: Figure 5—source data 1. [file elife-58604-fig5-data1.xlsx]

## Sheet: Sheet1
Delay (s)	Sham-Pre						Sham-Post						OVX-Pre						OVX-Post
	301	302	304	305	306	308	301	302	304	305	306	308	303	307	312	313	315	316	303	307	312	313	315	316
0	96	100	94	100	100	92	96	100	98	98	96	100	98	100	100	96	90	98	98	94	92	83.78	96	98
10	2.2	0	2	89.33	91.5	2	2	2	0	100	86	4	6	10.7	4	4	2.2	2	12	12.44	8	6.44	4	8
20	0	0	0	76.21	89.3	0	0	0	0	69.67	62	0	0	0	2	0	0	2.5	0	2.22	0	2	0	2
40	0	0	0	58.57	58.4	0	0	0	0	57.82	46.89	0	0	2	0	0	0	0	0	0	0	0	0	0
60	0	0	0	23.33	41.5	0	0	0	0	62.33	32	0	0	0	0	0	2.2	0	0	0	0	0	0	0
