# Supplementary material for: Testicular hormones mediate robust sex differences in impulsive choice in rats
Source: eLife. 2020 Sep 28;9:e58604. doi: 10.7554/eLife.58604 (PMC7521924; doi:10.7554/eLife.58604)
Supplement: Figure 5—source data 2. [file elife-58604-fig5-data2.xlsx]

## Sheet: Sheet1
	Pre-surgery						Post-surgery
	301/303	302/307	304/312	305/313	306/315	308/316	301/303	302/307	304/312	305/313	306/315	308/316
Sham	2.4	7.2	4.8	18.8	28.8	0.4	0.8	3.2	2.8	20.4	0.4	0
OVX	0.4	2	4	1.6	3.6	6	0.4	2.4	0.4	2.4	2.8	0.4
