# Supplementary material for: Testicular hormones mediate robust sex differences in impulsive choice in rats
Source: eLife. 2020 Sep 28;9:e58604. doi: 10.7554/eLife.58604 (PMC7521924; doi:10.7554/eLife.58604)
Supplement: Figure 5—source data 3. [file elife-58604-fig5-data3.xlsx]

## Sheet: Sheet1
Delay (s)	Sham						OVX
	301	302	304	305	306	308	303	307	312	313	315	316
0	100	100	100	96		100		100	96	100	98	98
2	98	77.33	12	96		86		87.33	14	92	88	14
4	81.78	10.67	0	94.67		34.22		88.5	0	94	72	2
8	45.87	12.3	0	71.31		26.22		86.03	2	63.89	20	0
16	17.39	16.17	0	67.14		12		49.5	0	43.99	12	0
