# Supplementary material for: Testicular hormones mediate robust sex differences in impulsive choice in rats
Source: eLife. 2020 Sep 28;9:e58604. doi: 10.7554/eLife.58604 (PMC7521924; doi:10.7554/eLife.58604)
Supplement: Figure 6—source data 1. [file elife-58604-fig6-data1.xlsx]

## Sheet: Sheet1
Delay (s)	Sham-Pre								Sham-Post								Cast-Pre								Cast-Post
	1	5	9	15	21	23	27	29	1	5	9	15	21	23	27	29	3	7	11	13	17	19	25	31	3	7	11	13	17	19	25	31
0	100	90	100	100	100	94	97.1	100	96	96	100	100	100	87.56	96	100	100	96	100	100	100	96	100	98	100	98	100	96	100	96	90	94
10	97.5	49.3333	40.8889	70	100	60	95.7	44	95.7778	48	98	56.8889	100	84	70	0	78	22	93.7778	68.5	88	8	92	94	83.7778	24.6667	87.3333	16	77.78	18.79	40	56
20	85.1429	28.6667	22.8889	38.8889	96	32	80.6	6	93.7778	34	97.7778	20	98	35.11	62	0	56	6	89.2063	48	78	0	96	62.7	58.9841	2	73.8889	8	36.28	0	4	55.33
40	86.3492	20	16	26	85	20	73.5	9.7	100	16	80.8889	14	96	32	46	0	33.5556	2	79.8333	46	32	2	92	69.1	40.8889	4	45.2381	4	16.11	0	0	48
60	92.6667	14	18	14	77.6	18	50.3	2	88.5	14.2222	47.5556	22	81.78	20	26	0	28.381	2	51.3889	34	22	0	91.5	60.9	38.4444	4.22222	30.8333	12	0	0	0	16.22
