# Supplementary material for: Testicular hormones mediate robust sex differences in impulsive choice in rats
Source: eLife. 2020 Sep 28;9:e58604. doi: 10.7554/eLife.58604 (PMC7521924; doi:10.7554/eLife.58604)
Supplement: Figure 6—source data 2. [file elife-58604-fig6-data2.xlsx]

## Sheet: Sheet1
	Pre-surgery								Post-surgery
	1/3	5/7	9/11	15/13	21/17	23/19	27/25	29/31	1/3	5/7	9/11	15/13	21/17	23/19	27/25	29/31
Sham	92.3317	40.4	39.5556	49.7778	92	45	79	32	94.8	41.6	84.8	42.6	95.2	51.7	60	20
ORX	59.1873	26	82.8413	59	64	21	94	77	64.4	26.6	67.5	27.2	46	23	26.8	53.9
