# Supplementary material for: Testicular hormones mediate robust sex differences in impulsive choice in rats
Source: eLife. 2020 Sep 28;9:e58604. doi: 10.7554/eLife.58604 (PMC7521924; doi:10.7554/eLife.58604)
Supplement: Figure 6—source data 3. [file elife-58604-fig6-data3.xlsx]

## Sheet: Sheet1
	Pre-surgery								Post-surgery
	1/3	5/7	9/11	15/13	21/17	23/19	27/25	29/31	1/3	5/7	9/11	15/13	21/17	23/19	27/25	29/31
Sham	19.6	0.8	1.2	0.4	1.6	0	5.2	2	4.8	0.4	2.4	4.4	0.4	1.6	0	0
ORX	2.4	0	12.8	2.4	0.4	4	0.8	5.2	4.4	1.6	13.2	0	9.2	9.6	0	0.8
