# Supplementary material for: Testicular hormones mediate robust sex differences in impulsive choice in rats
Source: eLife. 2020 Sep 28;9:e58604. doi: 10.7554/eLife.58604 (PMC7521924; doi:10.7554/eLife.58604)
Supplement: Figure 7—source data 1. [file elife-58604-fig7-data1.xlsx]

## Sheet: Sheet1
Delay (s)	Small Reward								Large Reward								Small Reward								Large Reward
	3	7	11	13	17	19	25	31	3	7	11	13	17	19	25	31	3	7	11	13	17	19	25	31	3	7	11	13	17	19	25	31
0	1.435	1.347	2.5	2.38	2.224	1.31	1.856	2.086	0.797	0.719	1.185	0.804	1.595	0.963	0.72	0.655	1.6962	1.3114	2.9164	1.8894	2.895	1.674	1.684	1.246	0.817	0.559	1.3056	0.915	2.0863	1.053	0.736	0.692
10	2.656	1.279	4.423	2.085	2.979	1.582	1.689	2.709	0.616	1.276	2.723	0.768	1.824	0.804	0.72	0.783	1.644	1.86	2.606	1.5	2.464	1.959	1.687	1.598	0.839	3.269	1.936	1.206	2.36	1.866	0.68	0.895
20	4.299	0.896	5.209	1.5425	3.075	0.951	2.419	2.886	1.032	5.2825	3.916	1.073	2.598	5.405	1.049	1.145	2.538	1.167	3.751	1.247	3.36	1.232	1.602	1.593	2.913	5.674	4.748	1.977	5.761	5.937	1.253	1.246
40	4.201	1.062	4.419	1.548	2.218	1.045	2.205	3.302	1.179	4.108	4.835	1.045	3.991	4.01	1.2484	1.131	1.9454	1.9248	4.4748	1.36	2.9138	1.357	1.306	1.284	4.347	6.645	6.624	1.564	3.826	6.258	1.735	1.491
60	2.313	1.433	4.855	2.014	3.224	1.127	2.256	2.888	1.217	5.5775	5.141	0.963	3.673	4.0563	1.102	1.227	2.755	1.181	2.815	1.264	2.107	1.518	1.184	1.76	3.171	5.945	6.809	1.588	8.143	5.563	4.865	1.171
