# Supplementary material for: Testicular hormones mediate robust sex differences in impulsive choice in rats
Source: eLife. 2020 Sep 28;9:e58604. doi: 10.7554/eLife.58604 (PMC7521924; doi:10.7554/eLife.58604)
Supplement: Figure 7—source data 2. [file elife-58604-fig7-data2.xlsx]

## Sheet: Sheet1
Delay (s)	Small Reward								Large Reward								Small Reward								Large Reward
	3	7	11	13	17	19	25	31	3	7	11	13	17	19	25	31	3	7	11	13	17	19	25	31	3	7	11	13	17	19	25	31
0	0	0	0	0	0	0	0	0	0	0	0	20	0	0	0	20	0	0	0	0	0	0	0	0	0	0	0	0	20	0	0	0
10	0	0	20	0	0	0	0	0	0	0	0	20	0	0	0	0	20	0	0	0	0	0	0	0	0	0	0	0	0	0	40	0
20	0	0	20	20	0	0	0	0	0	20	0	0	0	40	0	0	0	0	0	0	0	40	0	0	0	20	20	0	0	0	60	0
40	0	0	0	0	0	0	20	0	0	0	0	0	0	60	0	20	0	0	20	0	20	0	0	0	0	40	20	0	20	60	80	0
60	0	20	0	0	0	0	0	20	0	20	20	0	40	20	0	0	0	0	0	0	40	0	0	0	0	20	0	0	60	60	60	0
